# Supplementary material
Source: PubMed Central journal article supplement (PMC2148271)

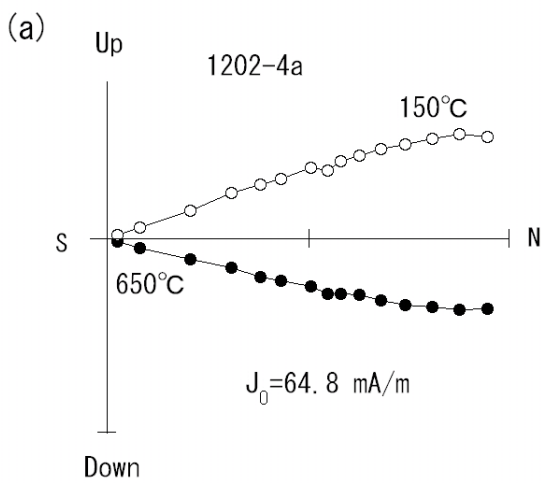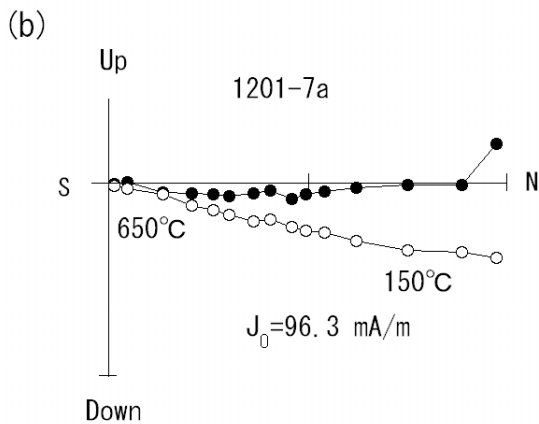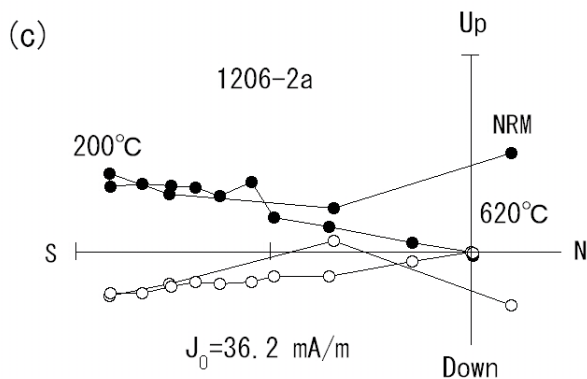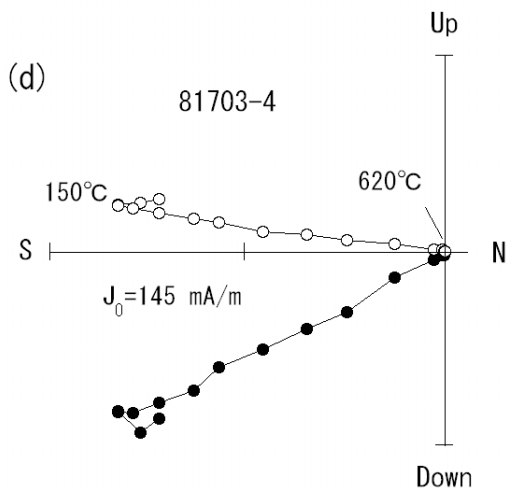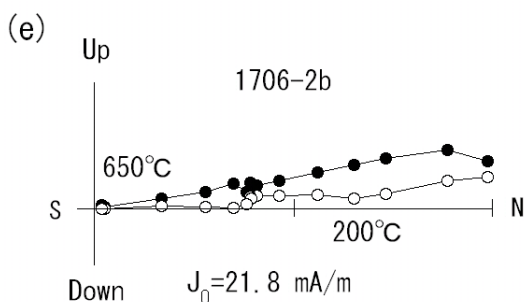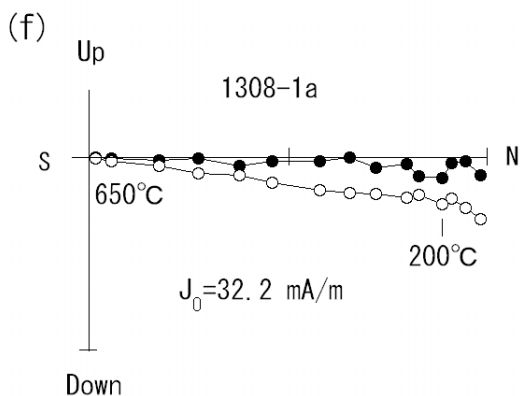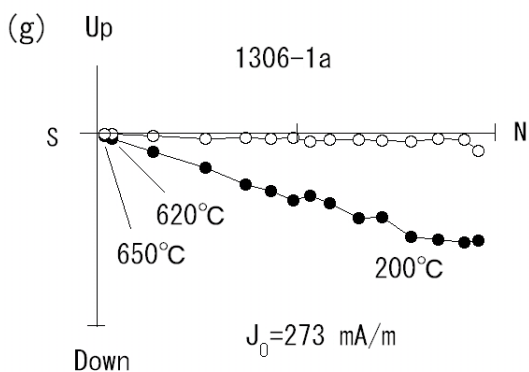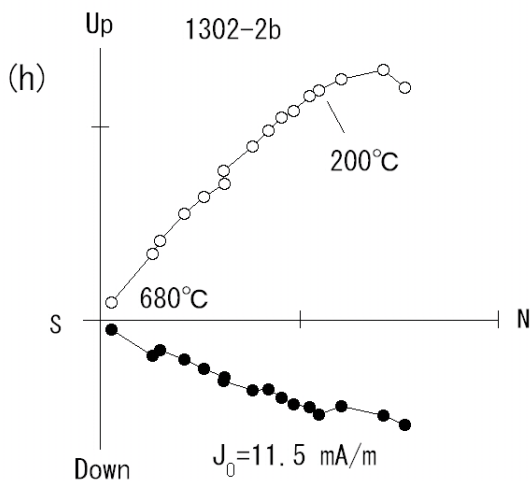

Supplement: pnas_0706190104_5.pdf [file pnas_0706190104_5.pdf]
